# Supplementary material
Source: PubMed Central journal article supplement (PMC2694111)
Supplement: supp_90917.2008_legends.pdf [file supp_90917.2008_legends.pdf]

SUPPLEMENTAL FIGURE 1. Example site showing high STRF variability. Panels (A) through (C) are STRF plots obtained from the neural recording site that illustrated the greatest variance in STRF similarity index; timestamps at the upper-right corner of each STRF plot indicate the time elapsed after the start of the first recording block obtained at that same site. Also indicated in the plots are the similarity indices calculated for the two corresponding STRFs.

SUPPLEMENTAL FIGURE 2. STRF signal-to-noise ratio is weakly correlated to STRF similarity index. The figure plots the STRF signal-to-noise ratio (SNR) in dB against the STRF similarity index, where the SNR values plotted correspond to the second and subsequent STRFs obtained at a particular recording site. SNR was calculated by dividing the power obtained in the causal region of the STRF (from 0 to 100 ms) by the power obtained in the acausal region of the STRF (from -150 to -50 ms). The correlation coefficient was 0.60 ( $p < 0.001$ ).
