# Supplementary material
Source: PubMed Central journal article supplement (PMC2694111)

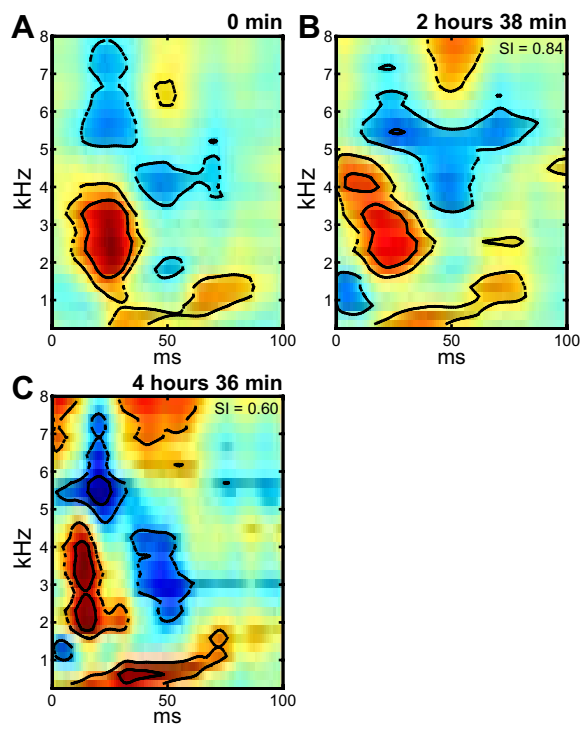

Supplement: supp_90917.2008_figS1.pdf [file supp_90917.2008_figS1.pdf]

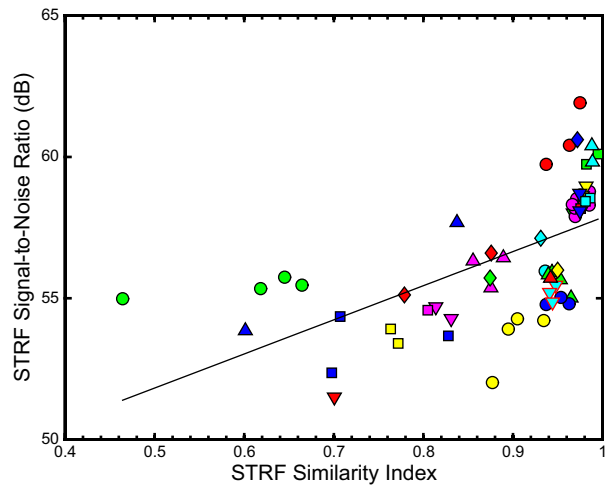

Supplement: supp_90917.2008_figS2.pdf [file supp_90917.2008_figS2.pdf]
